# Supplementary material for: Global research challenges and opportunities for mental health and substance-use disorders
Source: PubMed Central journal article supplement (PMC6368440; doi:10.1038/nature16032), 2015-11-19

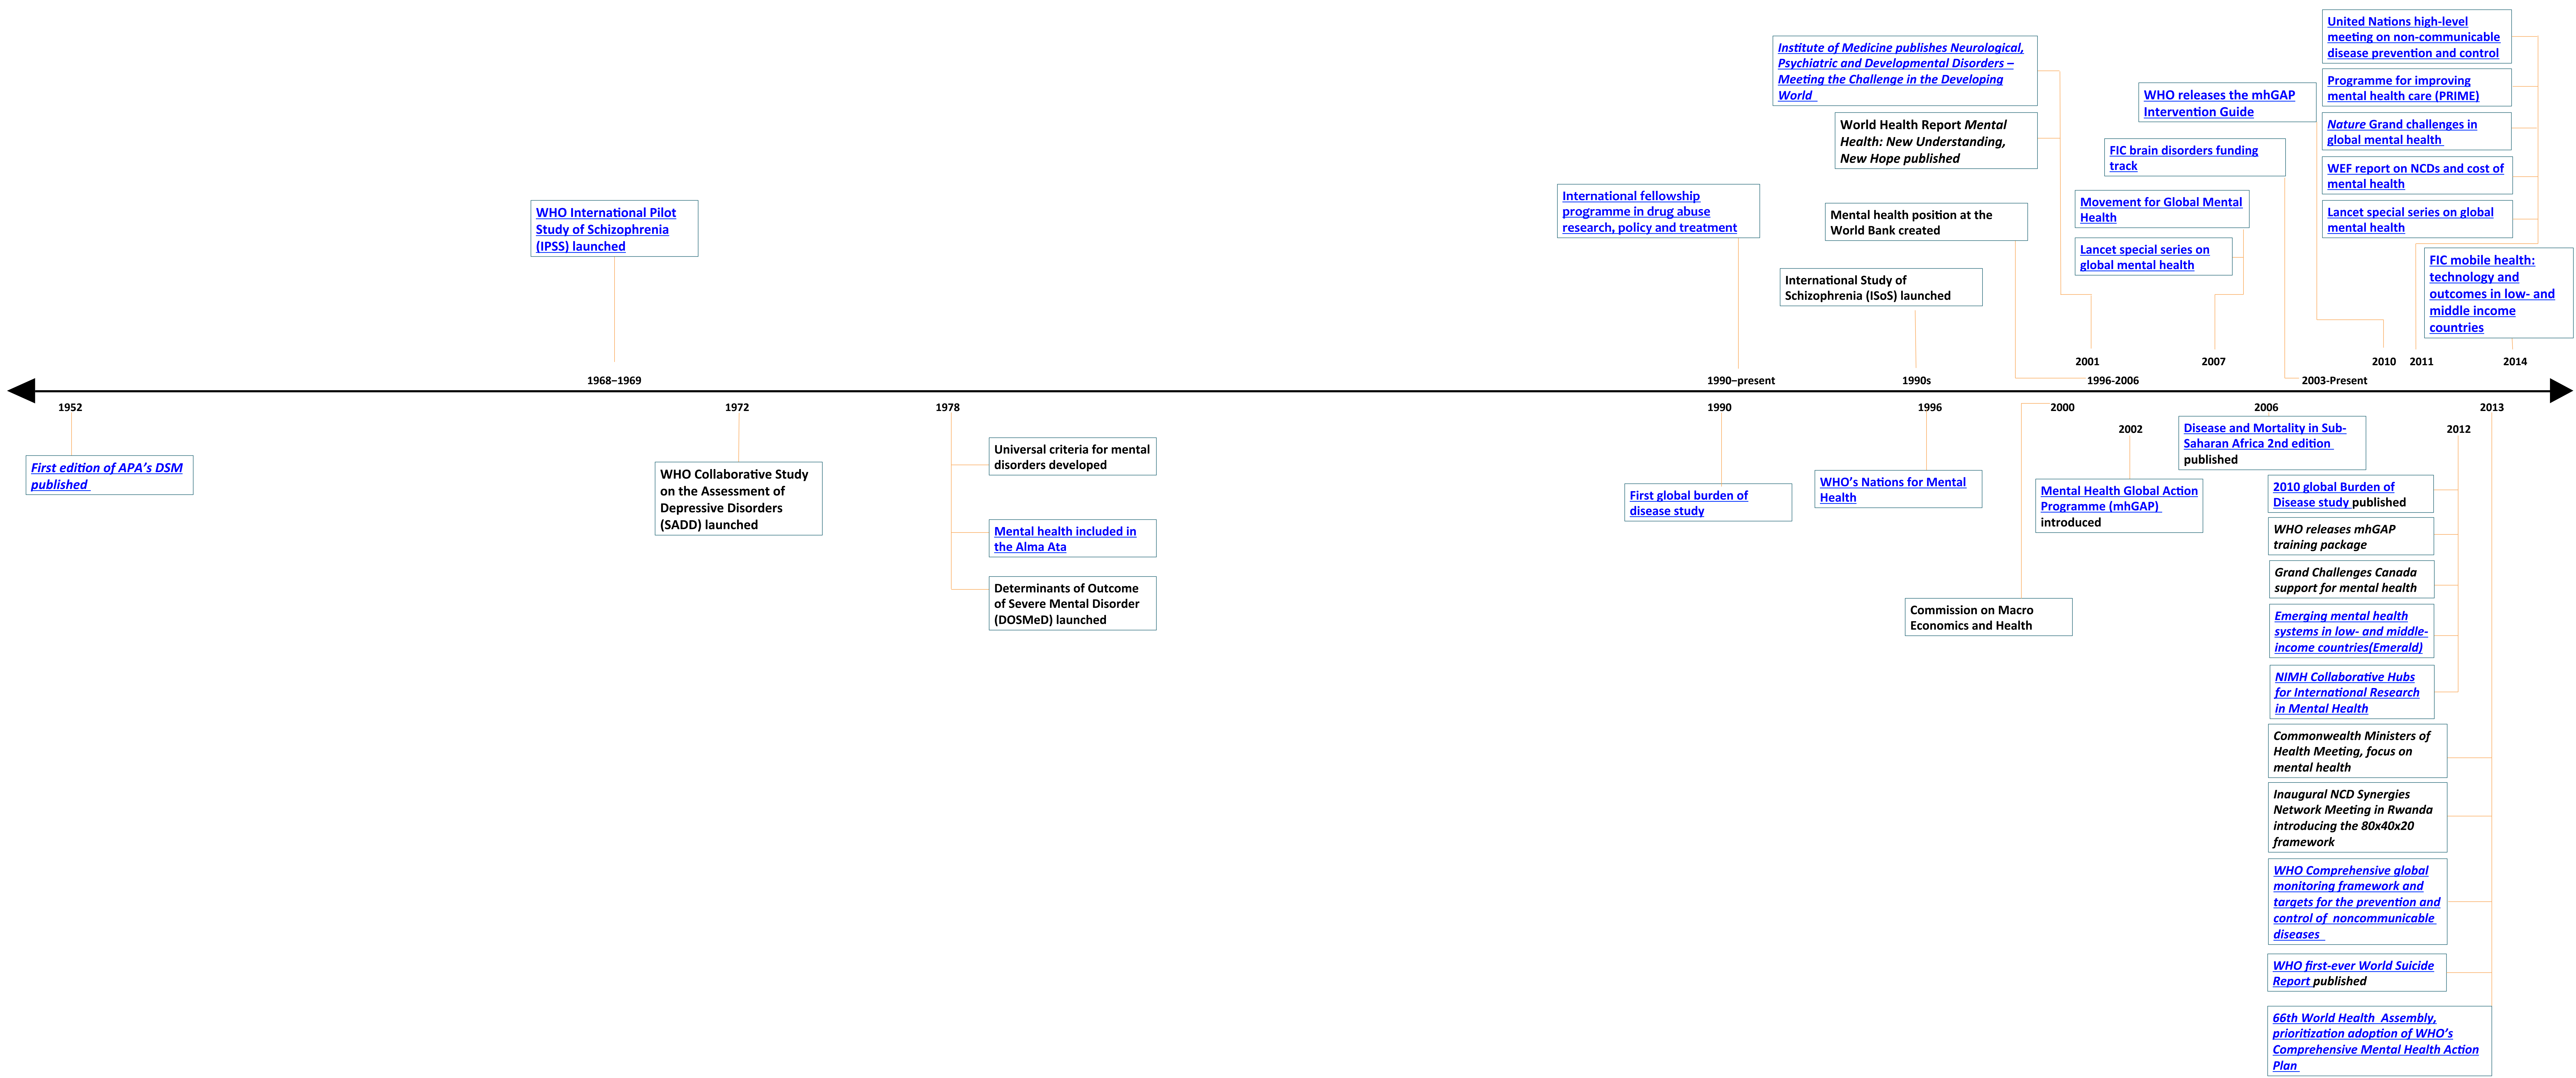

Supplement: NIHMS994603-supplement-1.pdf [file NIHMS994603-supplement-1.pdf]
